# Supplementary material for: Investigation of the target-site resistance of EPSP synthase mutants P106T and T102I/P106S against glyphosate
Source: PubMed Central journal article supplement — RSC Adv. 2020 Dec 16;10(72):44352–60. doi: 10.1039/d0ra09061a (PMC9058485; doi:10.1039/d0ra09061a), 2020-12-16
Supplement: RA-010-D0RA09061A-s001.pdf [file RA-010-D0RA09061A-s001.pdf]

## SUPPORT INFORMATION

### **Investigation of the target-site resistance of EPSP synthase mutants P106T and T102I/P106S against glyphosate**

Emily C. M. Fonseca<sup>1</sup>, Kauê S. da Costa<sup>2,\*</sup>, Jerônimo Lameira<sup>1</sup>, Cláudio N.  
Alves<sup>1</sup>, Anderson H. Lima<sup>1,\*</sup>

*1 Laboratório de Planejamento e Desenvolvimento de Fármacos, Instituto de  
Ciências Exatas e Naturais, Universidade Federal do Pará, 66075-110, Belém,  
Pará, Brasil.*

*2 Instituto de Biodiversidade. Universidade Federal do Oeste do Pará,  
68035-110, Santarém, Pará, Brasil.*

\*Authors for correspondence:

1. Anderson Henrique Lima e Lima. Universidade Federal do Pará. Rua Augusto  
Corrêa 01. Guamá. Belém Pará Brazil Zipcode: 66075 110. E-mail: [anderson@ufpa.br](mailto:anderson@ufpa.br).

2. Kauê Santana da Costa. Universidade Federal do Oeste do Pará. Rua Vera Paz,  
s/n Salé. Santarém, Pará Brazil. Zipcode: 68040-255. Phone number: +55 93 2101-6771.  
E-mail: [kaue.costa@ufopa.edu.br](mailto:kaue.costa@ufopa.edu.br).

#### **ORCID of the authors:**

Emilly Christie Maia Fonseca: 0000-0003-3074-9576.

Kauê Santana da Costa: 0000-0002-2735-8016.

Anderson Henrique Lima e Lima: 0000-0002-8451-9912.

## Predicted Structures of EPSPS Showed Reliable Stereochemical and Energy Profiles

The protein sequence of sensitive species of *C. sumatrensis*; *E. indica*, and *L. spicata* were obtained from the UniProt database[1] using the accession codes AAY40474.1, Q95AK0, and KP143747, respectively. To select the most suitable reference structure for homology modeling, we performed a sequence alignment using the BLASTp tool. The EPSPS structure of *Vibrio cholerae* (accession code 3NVS) showed 56.57% of similarity with the EPSPS sequence of the three analyzed species. The overall quality of the model was analyzed using the QMEAN scoring function (Figure S1) [2]. Regarding the *Ei*EPSPS, 95.37% of residues were found in the favorable regions, 3.70% of residues in the permitted regions, and 0.93% in non-permitted regions.

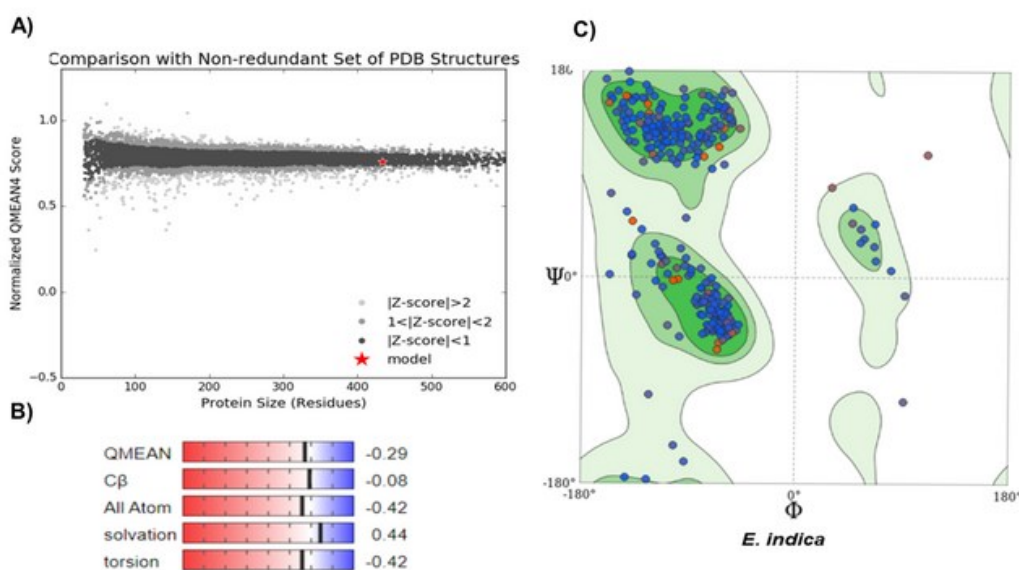

**Figure S1.** Structural validation of the modeled wild-type *Ei*EPSPS structure. Panel (A) shows the Z-score of *Ei*EPSPS structure comparing it with similar structures elucidated by experimental methods. Panel (B) shows the energy profile evaluated by the QMEAN score. Panel (C) represents the Ramachandran plot of the *Ei*EPSPS structure.

Regarding the *Cs*EPSPS structure, the analysis of the Ramachandran plot showed 94.77% in the most favorable regions, 3.64% of the residues in the permitted regions, and 1.59% in the non-permitted regions.

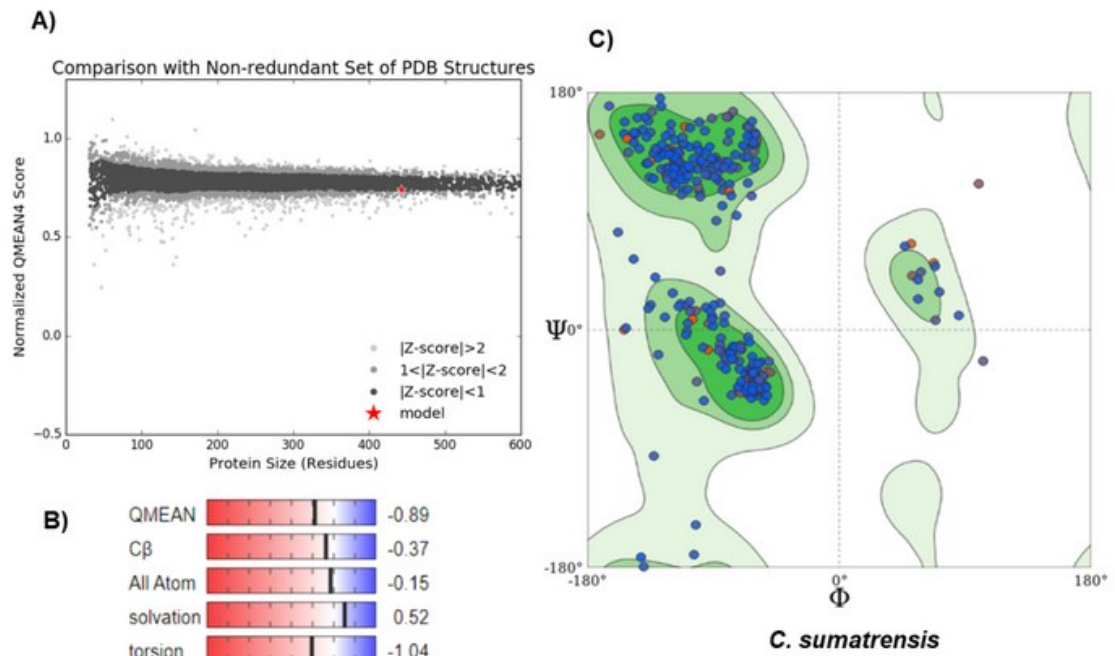

**Figure S2.** Structural validation of the modeled wild-type *Cs*EPSPS structure. Panel (A) shows the Z-score of the *Cs*EPSPS structure comparing it with similar structures elucidated by experimental methods. Panel (B) shows the energy profile evaluated by the QMEAN energy score. Panel (C) represents the Ramachandran plot of the structure.

| <i>C. sumatrensis</i> |                |                      |                      |
|-----------------------|----------------|----------------------|----------------------|
| Structural variants   | Total energy   | van der Waals energy | Electrostatic energy |
| Sensitive             | -95.80 ± 0.47  | -18.51 ± 0.22        | -65.12 ± 1.16        |
| Resistant             | -75.64 ± 0.48  | -9.29 ± 0.24         | 12.50 ± 0.87         |
| <i>E. indica</i>      |                |                      |                      |
| Sensitive             | -126.04 ± 0.47 | -3.23 ± 0.21         | -173.11 ± 1.13       |
| Resistant             | -75.67 ± 0.56  | -3.88 ± 0.26         | -152.71 ± 1.79       |

**Table S1.** Electrostatic and van der Waals components (kcal.mol<sup>-1</sup>) of the binding free energy obtained using molecular mechanics Generalized Born surface area (MM/GBSA) method for both *Conyza sumatrensis* 5-enolpyruvyl shikimate-3-phosphate synthase (*Cs*EPSPS) and *Eleusine indica* EPSPS (*Ei*EPSPS) structures complexed with glyphosate.

## References

- [1] M. Magrane, U.P. Consortium, UniProt Knowledgebase: A hub of integrated protein data, Database. 2011 (2011) bar009–bar009.  
<https://doi.org/10.1093/database/bar009>.
- [2] P. Benkert, T. Schwede, S.C.E. Tosatto, QMEANclust: estimation of protein model quality by combining a composite scoring function with structural density information, BMC Struct. Biol. 9 (2009) 35.  
<https://doi.org/10.1186/1472-6807-9-35>.
- [3] E. Krieger, S.B. Nabuurs, G. Vriend, Homology Modeling, in: Struct. Bioinforma., John Wiley & Sons, Inc., 2005: pp. 509–523.  
<https://doi.org/10.1002/0471721204.ch25>.
